# Supplementary material
Source: publisher figshare collection journal article supplement (https://aacr.figshare.com/articles/dataset/_/22524390)
Supplement: Supplementary file 1 [file 39987216]

## Supplemental Material

**SUPPLEMENTAL TABLE 1.** Statins and Risk of Colorectal Cancer by *HMGCR*

rs12654264 Genotype

| Genotype    | Control | Case | Odds Ratio | 95% Confidence Interval |
|-------------|---------|------|------------|-------------------------|
| A/A         |         |      |            |                         |
| Non user    | 561     | 511  | 1.00       |                         |
| Statin user | 72      | 20   | 0.30       | 0.18 - 0.51             |
| A/T         |         |      |            |                         |
| Non user    | 777     | 807  | 1.00       |                         |
| Statin user | 108     | 50   | 0.45       | 0.31 - 0.63             |
| T/T         |         |      |            |                         |
| Non user    | 310     | 311  | 1.00       |                         |
| Statin user | 47      | 31   | 0.66       | 0.41 - 1.06             |

p interaction (case-only) = 0.0012

**SUPPLEMENTAL TABLE 2.** Association between genetic variation in *HMGCR* and long-term statin use

| <b>SNP</b>               | <b>Log-additive p-value*</b> |              |
|--------------------------|------------------------------|--------------|
|                          | <b>Controls</b>              | <b>Cases</b> |
| <i>HMGCR</i> _rs10515198 | 0.21                         | 0.064        |
| <i>HMGCR</i> _rs12654264 | 0.40                         | 0.0012       |
| <i>HMGCR</i> _rs2241402  | 0.0015                       | 0.14         |
| <i>HMGCR</i> _rs2303152  | 0.57                         | 0.015        |
| <i>HMGCR</i> _rs4704209  | 0.019                        | 0.14         |
| <i>HMGCR</i> _rs5908     | 0.11                         | 0.72         |

\* *These p-values correspond to the test for interaction between genotypes and long term statin use*
